# Supplementary material
Source: PubMed Central journal article supplement (PMC5373342)
Supplement: pnas.1619745114.sapp.pdf [file pnas.1619745114.sapp.pdf]

# A SUMOylation consensus VKGE

+ VKGE

VKGE

Majority

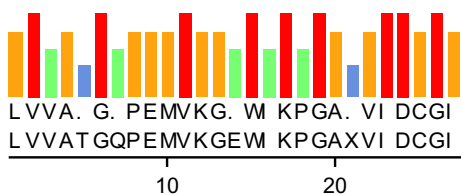

NP\_005947.3.pro  
 XP\_510001.3.pro  
 XP\_001101708.2.pro  
 XP\_537476.2.pro  
 NP\_001076946.1.pro  
 NP\_620084.2.pro  
 NP\_071953.1.pro  
 NP\_001034392.1.pro  
 NP\_955823.1.pro  
 NP\_731489.2.pro  
 XP\_312083.5.pro  
 NP\_595256.1.pro  
 XP\_956550.1.pro

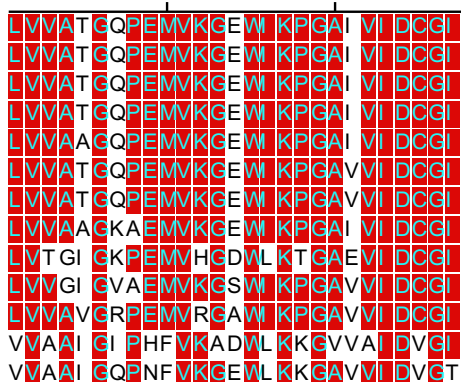

# B

+ EVELYGETKAK

EVELYGETKAK

Majority

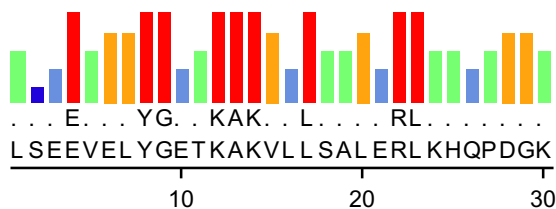

NP\_005947.3.pro  
 XP\_510001.3.pro  
 XP\_001101708.2.pro  
 XP\_537476.2.pro  
 NP\_001076946.1.pro  
 NP\_620084.2.pro  
 NP\_071953.1.pro  
 NP\_001034392.1.pro  
 NP\_955823.1.pro  
 NP\_731489.2.pro  
 XP\_312083.5.pro  
 NP\_595256.1.pro  
 XP\_956550.1.pro

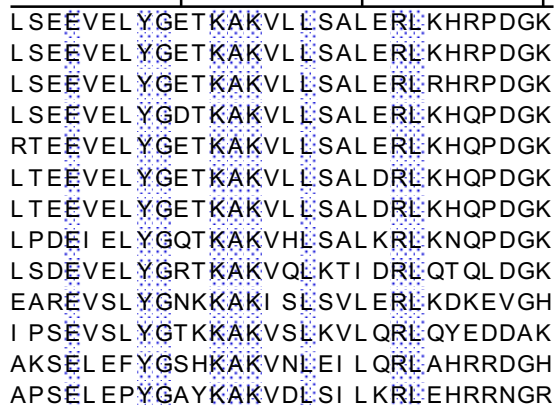

# C

+ SFQLLYDLKLP

SFQLLYDLKLP

Majority

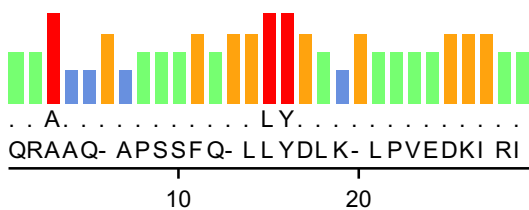

NP\_005947.3.pro  
 XP\_510001.3.pro  
 XP\_001101708.2.pro  
 XP\_537476.2.pro  
 NP\_001076946.1.pro  
 NP\_620084.2.pro  
 NP\_071953.1.pro  
 NP\_001034392.1.pro  
 NP\_955823.1.pro  
 NP\_731489.2.pro  
 XP\_312083.5.pro  
 NP\_595256.1.pro  
 XP\_956550.1.pro

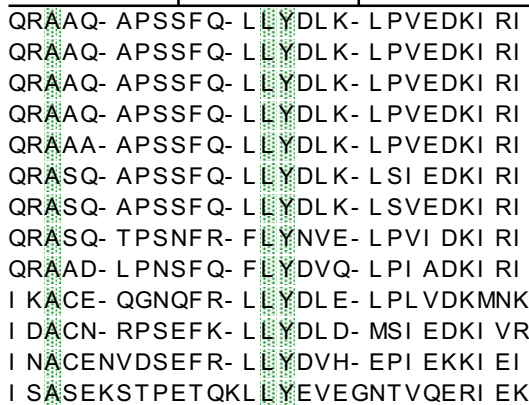

Supplementary Figure 1.

(A) SUMOylation consensus VKGE (corresponding to human MTHFD1 aa 222-227) is highly conserved in MTHFD1 proteins. Accession IDs for the species aligned are: H.sapiens NP\_005947.3, P.troglodytes XP\_510001.3, M.mulatta XP\_001101708.2, C.lupus XP\_537476.2, B.Taurus NP\_001076946.1, M.musculus NP\_620084.2, R.norvegicus NP\_071953.1, G.gallus NP\_001034392.1, D.rerio NP\_955823.1, D.melanogaster NP\_731489.2, A.gambiae XP\_312083.5, S.pombe NP\_595256.1, N.crassa XP\_956550.1. Megalign (DNASar, Lasergene) package was used to align sequences using Clustal W method with default settings. (B) Reverse SUMOylation consensus EVELYGETKAK demonstrated a lower degree of conservation across species. C. Reverse SUMOylation consensus SRQLLYDLKLP is not conserved in 6 out of 13 (46%) MTHFD1 proteins.

A

AVLALTTTS

+ Majority

Majority

NP\_005947.3.pro

XP\_510001.3.pro

XP\_001101708.2.pro

XP\_537476.2.pro

NP\_001076946.1.pro

NP\_620084.2.pro

NP\_071953.1.pro

NP\_001034392.1.pro

NP\_955823.1.pro

NP\_731489.2.pro

XP\_312083.5.pro

NP\_595256.1.pro

XP\_956550.1.pro

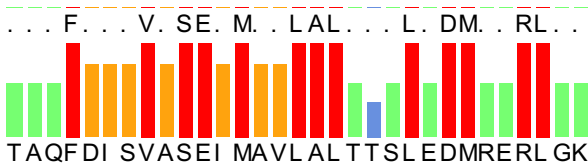

SIM1

B

+ VVVLVAT

Majority

NP\_005947.3.pro

XP\_510001.3.pro

XP\_001101708.2.pro

XP\_537476.2.pro

NP\_001076946.1.pro

NP\_620084.2.pro

NP\_071953.1.pro

NP\_001034392.1.pro

NP\_955823.1.pro

NP\_731489.2.pro

XP\_312083.5.pro

NP\_595256.1.pro

XP\_956550.1.pro

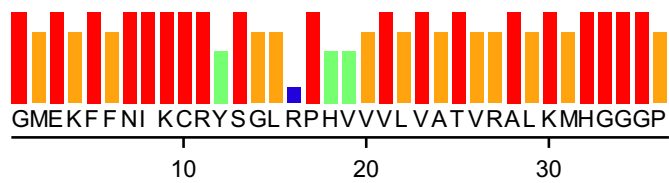

SIM2

C

ENLEVE

+ EVELYGETKAK

EVELYGETKAK

Majority

NP\_005947.3.pro

XP\_510001.3.pro

XP\_001101708.2.pro

XP\_537476.2.pro

NP\_001076946.1.pro

NP\_620084.2.pro

NP\_071953.1.pro

NP\_001034392.1.pro

NP\_955823.1.pro

NP\_731489.2.pro

XP\_312083.5.pro

NP\_595256.1.pro

XP\_956550.1.pro

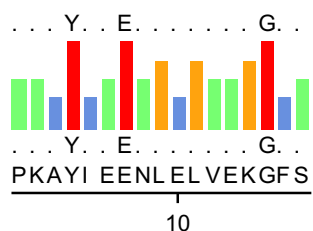

SIM3

Supplementary Figure 2.

A. SUMO-interacting motif (SIM) AVLALTTTS (corresponding to human MTHFD1 aa 571-578) is conserved in MTHFD1 proteins. Accession IDs for the species aligned are: H.sapiens NP\_005947.3, P.troglodytes XP\_510001.3, M.mulatta XP\_001101708.2, C.lupus XP\_537476.2, B.Taurus NP\_001076946.1, M.musculus NP\_620084.2, R.norvegicus NP\_071953.1, G.gallus NP\_001034392.1, D.tertio NP\_955823.1, D.melanogaster NP\_731489.2, A.gambiae XP\_312083.5, S.pombe NP\_595256.1, N.crassa XP\_956550.1. B. SUMO-interacting motif VVVLVAT (human MTHFD1 694-700) demonstrated a high degree of conservation across species. C. SUMO-interacting motif ENLELVE (human MTHFD1 726-732) is not conserved across species.

## A. Densitometry data for Fig. 4A

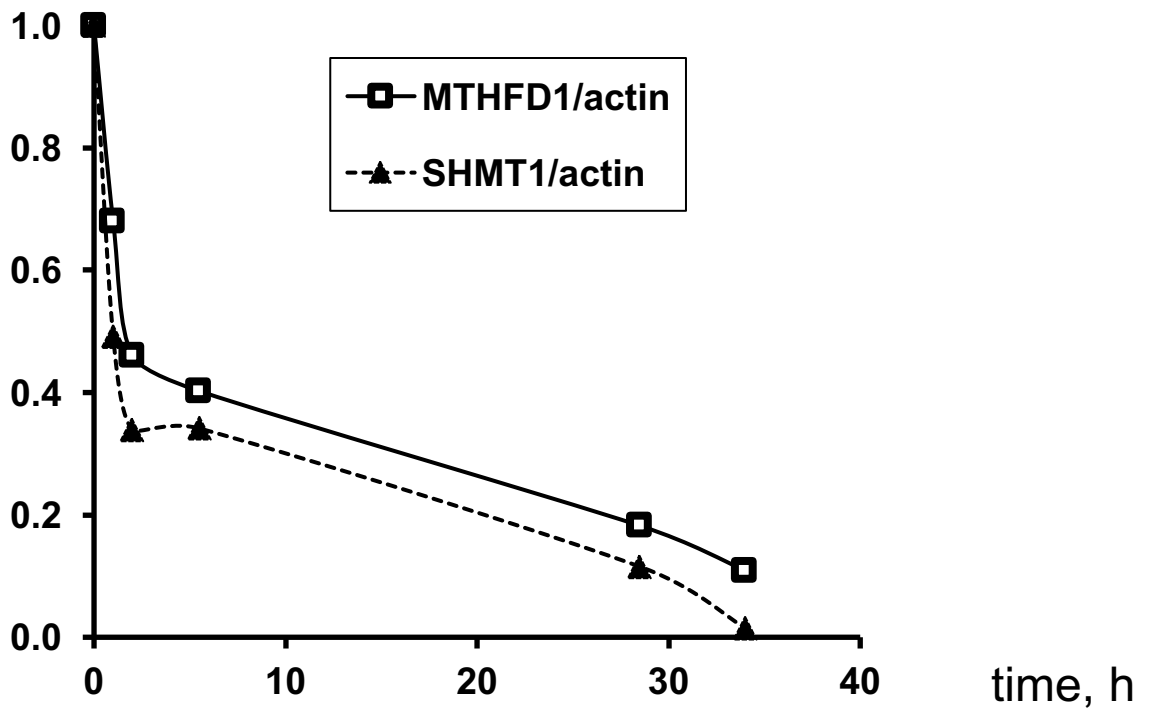

## B. Densitometry data for Fig. 5C

### SHMT1/actin levels

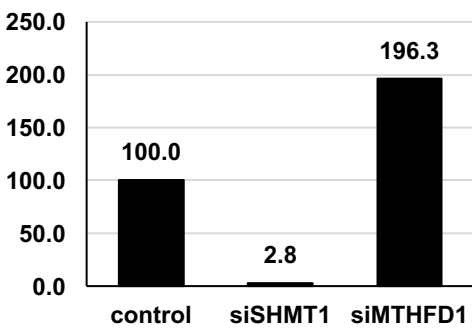

### SHMT2/actin levels

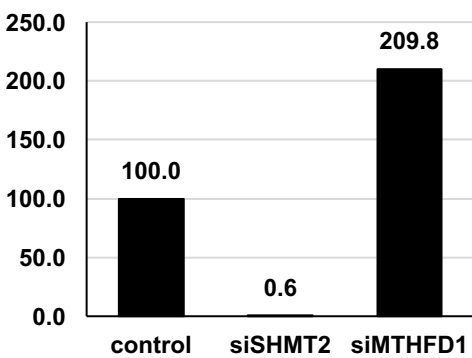

### MTHFD1/actin levels

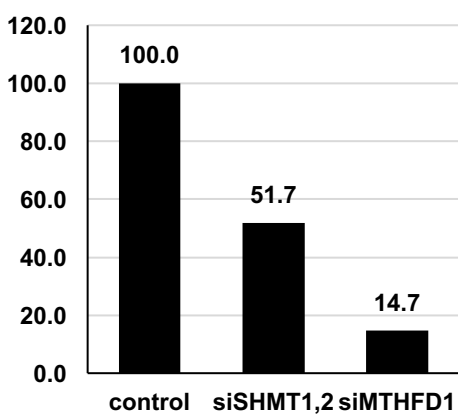

Supplementary Figure 3.  
(A) Densitometry data for Fig. 4A  
(B) Densitometry data for Fig. 5C
